# Supplementary material
Source: PubMed Central journal article supplement (PMC2796340)
Supplement: NIHMS158336-supplement-1_si_001.pdf [file NIHMS158336-supplement-1_si_001.pdf]

Supporting Online Material for

**Creating Protein Affinity Reagents by Combining Peptide  
Ligands on Synthetic DNA Scaffolds**

Berea A. R. Williams, Chris W. Diehnelt, Paul Belcher, Matthew Greving,  
Neal W. Woodbury, Stephen A. Johnston\*, John C. Chaput\*

\*To whom correspondence should be addressed:

Stephen A. Johnston: Telephone: (480) 727-0792, E-mail: [stephen.johnston@asu.edu](mailto:stephen.johnston@asu.edu)

John C. Chaput: Telephone: (480) 727-0392, E-mail: [john.chaput@asu.edu](mailto:john.chaput@asu.edu)

**This PDF file includes**

Figure S1-S6

Scheme S1

Tables S1-S5

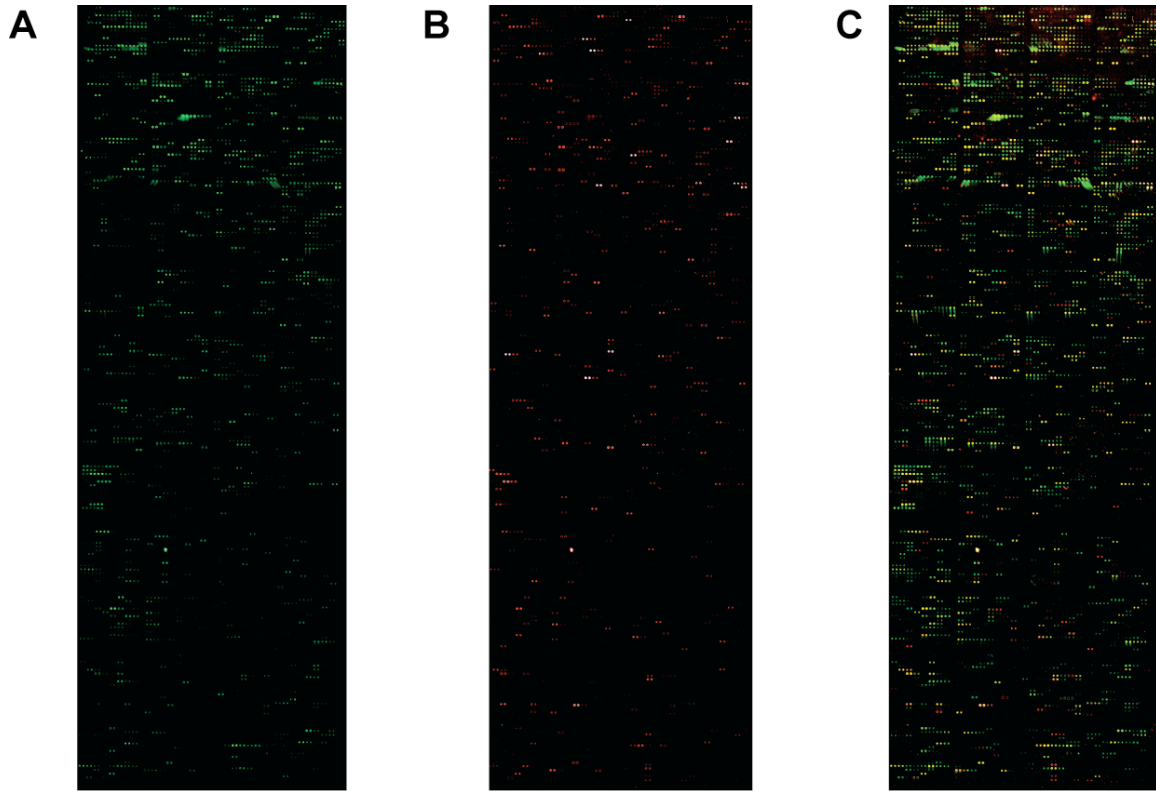

Figure S1. Transferrin ligand discovery using peptide microarrays. Custom peptide microarrays containing 10,000 unique 20-mer peptides were used to identify transferrin ligands. Alexa-555 labeled transferrin and Alexa-647 labeled *E. coli* lysate were mixed and incubated with the microarray. The slide was scanned for fluorescence at (A) 565 and (B) 665 nm, respectively. (C) The overlay of fluorescence at 565 and 665 nm was used to identify peptides with affinity to human transferrin in the presence of competing total *E. coli* lysate.

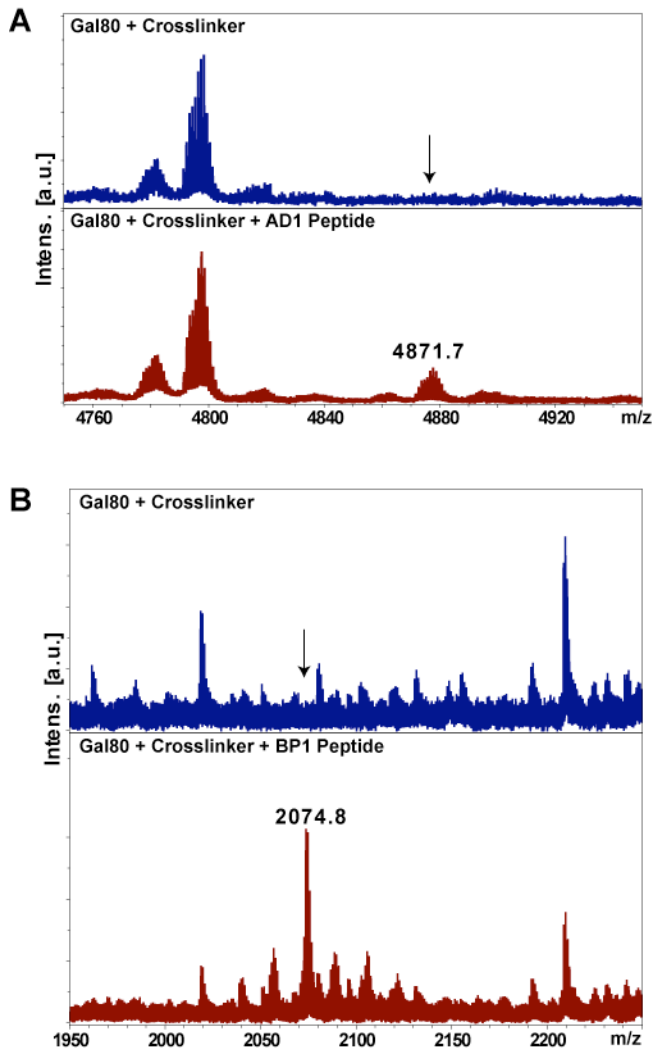

Figure S2. MALDI-TOF analysis of Gal80 crosslinked to each peptide ligand after trypsin digestion. (A) Mass spectrum of digested Gal80 protein with crosslinker (top) and Gal80 protein crosslinked to AD1 peptide (bottom). The peak that appears in the bottom but not the top spectra (indicated by arrow) corresponds to amino acid residues 1-4 of AD1 crosslinked to residues 384-420 of Gal80 (expected = 4871.5, observed = 4871.7). (B) Mass spectrum of Gal80 protein with crosslinker (top) and Gal80 protein crosslinked to BP1 peptide (bottom). The peak that appears in the bottom but not the top spectra (indicated by arrow) corresponds to amino acid residues 1-8 of BP1 crosslinked to residues 9-12 of Gal80 (expected = 2074.9, observed = 2074.8).

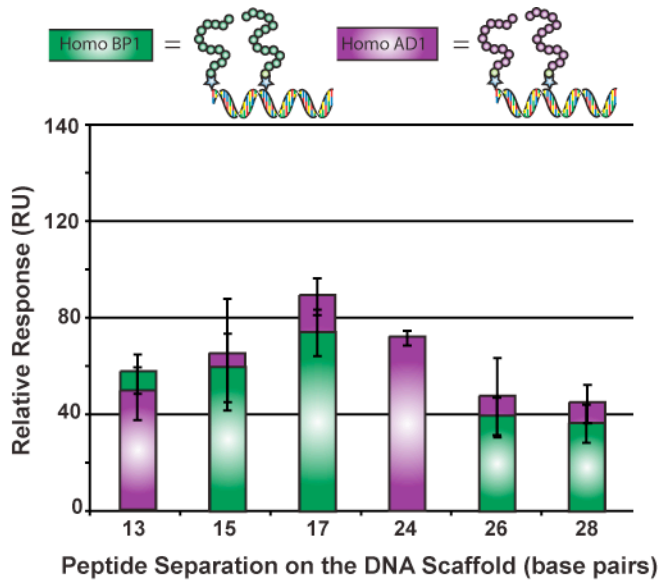

Figure S3. Relative binding affinity for homo-peptide Gal80 synbody combinations. Synbodies with homo-peptide pairs were spaced at different distances on the DNA scaffold and assayed for affinity to Gal80. Homo-BP1 synbody distance 24 was not assayed.

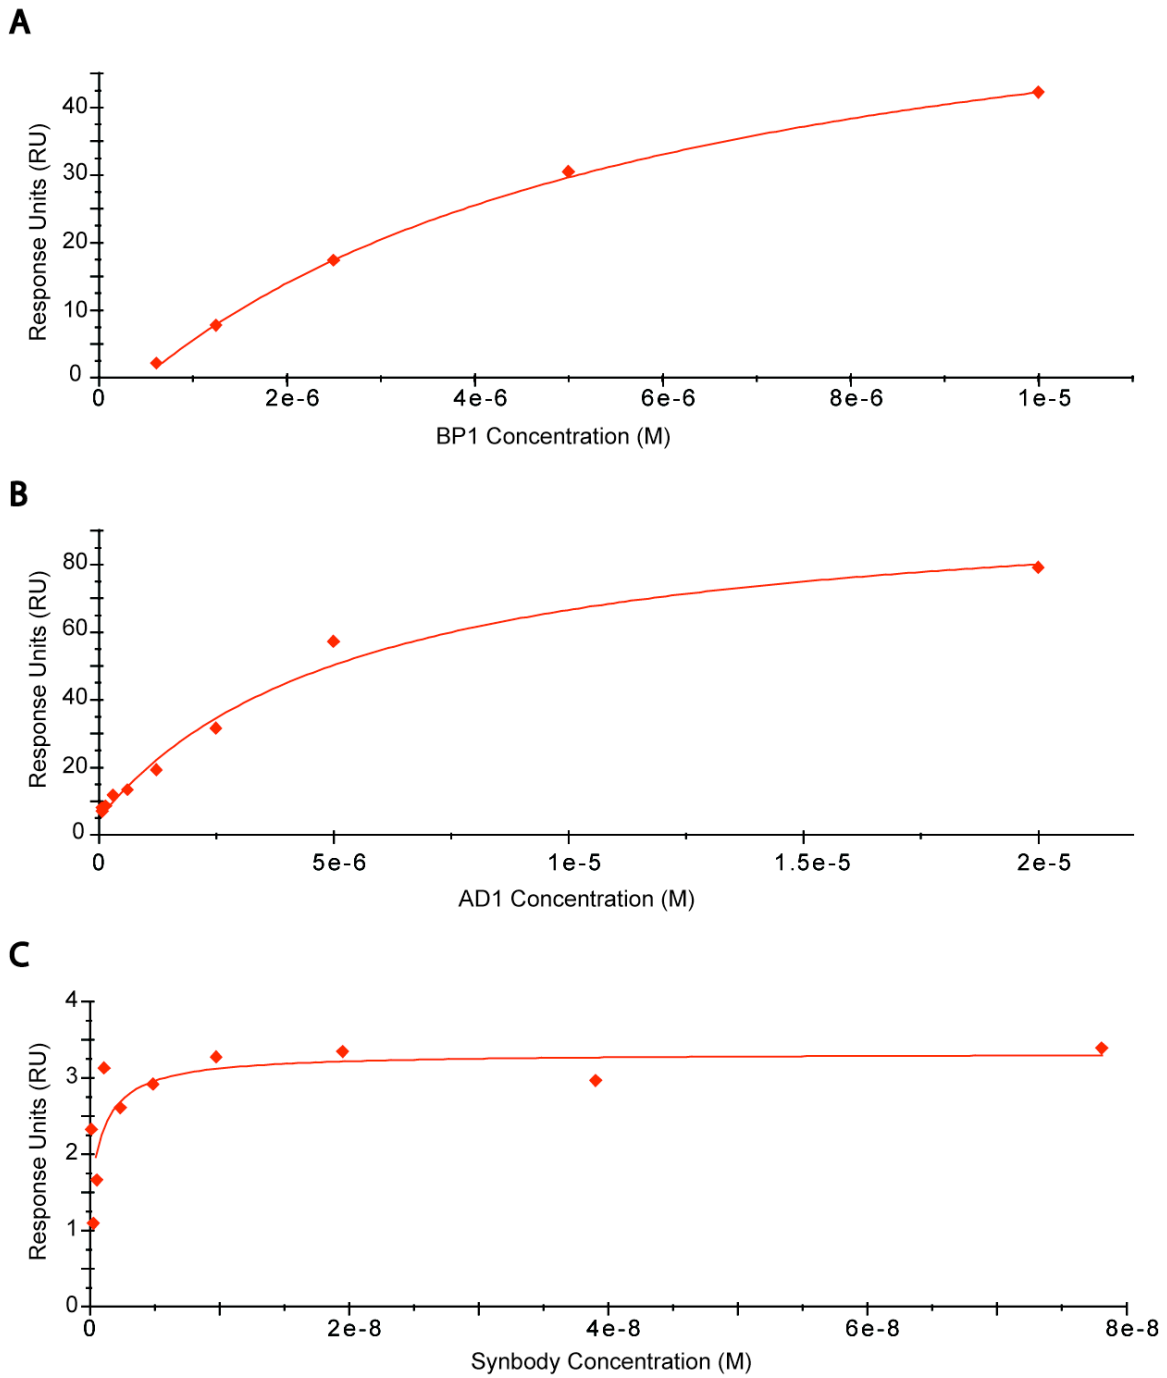

Figure S4. SPR analysis of Gal80 peptides and synbody construct 13. (A-C) Representative affinity plots for BP1, AD1, and SC-13 taken from multiple SPR assays, respectively. Affinity plots were created using the 1:1 binding model with the Biacore evaluation software.

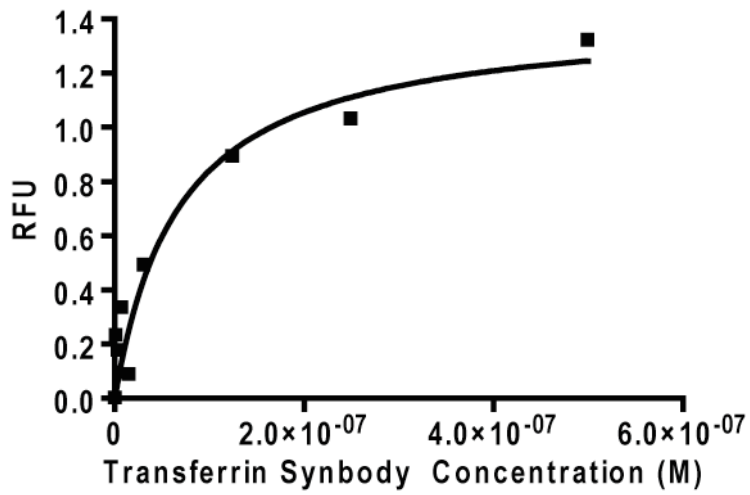

Figure S5. Binding affinity of the transferrin synbody. The binding affinity of SC-6 to transferrin was determined to be  $68.4 \pm 28.1$  nM using an ELISA-type assay.

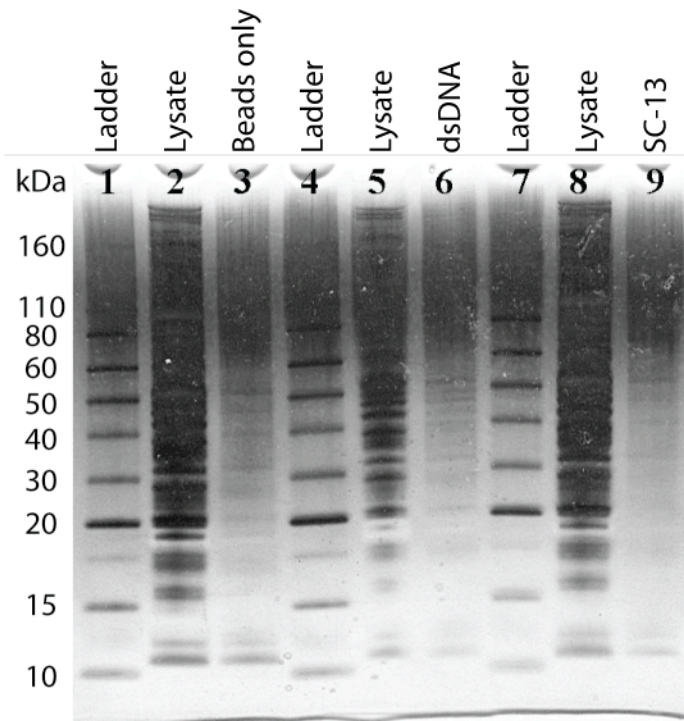

Figure S6. Control pulldown assay for non-specific binding to endogenous *E. coli* proteins. Background binding was analyzed using streptavidin coated magnetic (SA) beads (lane 3), SA beads containing the dsDNA scaffold (lane 6), and SC-13 (lane 9). Lanes 1, 4, and 7 contain the protein ladder; lanes 2, 5, and 8 contain crude *E. coli* lysate; lanes 3, 6, and 9 contain SDS elution from the beads. Each elution contained 100-fold greater volume than the crude lysate lane.

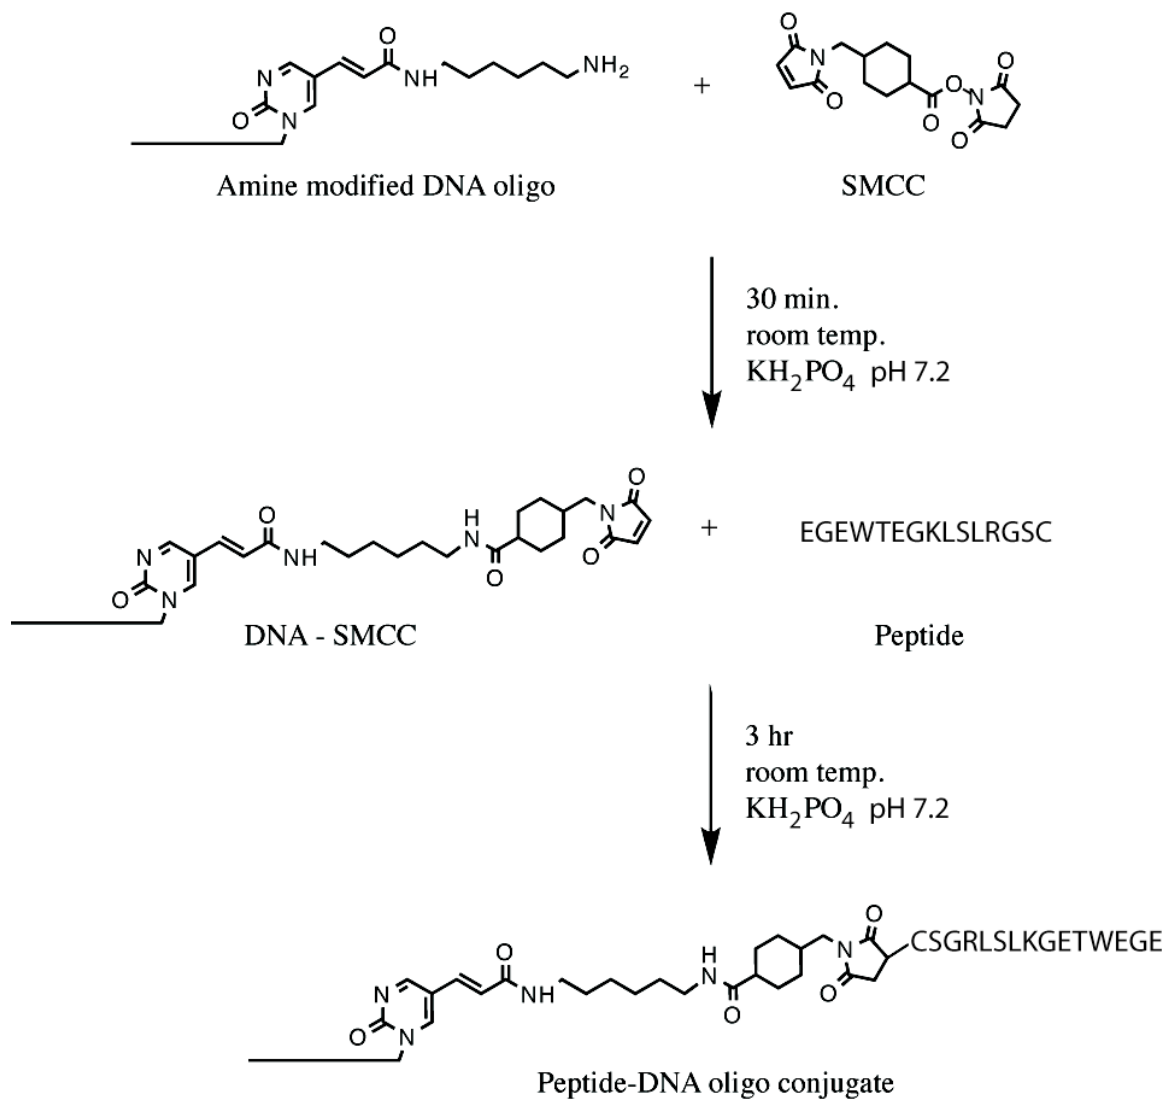

Scheme S1. Peptide conjugation to single-stranded DNA. The amine modified DNA oligonucleotide is conjugated to each peptide by first reacting the primary amine on the DNA with the NHS ester of the SMCC reagent, and then coupling a C-terminal cysteine residue on the peptide with the maleimide moiety of the DNA-SMCC intermediate.



Table S1. Gal80 Peptide Fluorescent Intensity Values<sup>1</sup>

| Name | Sequence (N-C) | Gal80  | Gal80<br>Blocked | Gal80/Gal80-<br>Blocked | AAT  | Transferrin |
|------|----------------|--------|------------------|-------------------------|------|-------------|
| BP1  | EGEWTEGKLSLR   | 236.55 | 11.86            | 19.95                   | 0.75 | 1.09        |
| BP2  | WSKSRLLSGLSR   | 125.49 | 14.21            | 8.83                    | 0.77 | 1.33        |
| BP3  | SERWESTSELRR   | 186.77 | 10.35            | 18.05                   | 0.63 | 1.20        |
| BP4  | LWLETREGSLTR   | 180.19 | 10.22            | 17.63                   | 0.58 | 1.52        |
| BP5  | GWSERGGSRTRL   | 143.39 | 17.81            | 8.05                    | 0.69 | 1.32        |
| BP6  | WLESSGSTSLRR   | 141.74 | 16.50            | 8.59                    | 1.08 | 1.03        |
| AD1  | GTEKGTSGWLKT   | 106.85 | 1.64             | 65.04                   | 1.05 | 2.24        |
| AD2  | SGWGSSELRKER   | 21.11  | 0.68             | 30.85                   | 0.50 | 0.72        |
| AD3  | TLWSETRTKRER   | 82.73  | 1.94             | 42.65                   | 0.58 | 0.86        |
| AD4  | KKWSKLTEKLRT   | 56.28  | 1.94             | 28.99                   | 0.77 | 1.78        |

<sup>1</sup>Fluorescent values are the average of Cy3 and Cy5 fluorescent intensities per peptide spot divided by the background fluorescent intensity of the array.

Table S2. Transferrin Peptide Fluorescent Intensity Values

| Name  | Sequence (N-C)       | Transferrin | Transferrin/ <i>E. coli</i> |
|-------|----------------------|-------------|-----------------------------|
| TRF19 | KEDNPGYSSEQDYNKLDGSC | 19954.5     | 7.6                         |
| TRF20 | GQTQFAMHRFQQWYKIKGSC | 16295.8     | 7.3                         |
| TRF21 | QYHHFMNLKROGRAQAYGSC | 15007.3     | 7.0                         |
| TRF22 | HAYKGPDMRRFNHSGMGSC  | 6012.8      | 6.2                         |
| TRF23 | FRGWAHIFFGPHVIYRGGSC | 12277.8     | 5.7                         |
| TRF24 | SVKPWRPLITGNRWLNSGSC | 10104.3     | 5.7                         |
| TRF25 | APYAPQQIHWSTLGFKGSC  | 7701.0      | 5.6                         |
| TRF26 | AHKVVPQRQIRHAYNRYGSC | 22763.0     | 5.6                         |
| TRF27 | LDPLFNFSIMVNWHRWMGSC | 16298.8     | 5.4                         |
| TRF28 | RFQLTQHYAQFWGHYTWGSC | 7502.0      | 5.2                         |

<sup>1</sup>Fluorescent values are for Alexa-555 labeled transferrin and Alexa-657 labeled *E. coli* lysate per peptide spot.

Table S3. Transferrin-Peptide Crosslinking Analysis.

| Peptide | Observed Mass (Da) | Transferrin Fragment    | Amino Acid Fragment |
|---------|--------------------|-------------------------|---------------------|
| TRF23   | 1798.9             | KCSTSSLLEACTFRRP        | 664-679             |
| TRF23   | 2003.9             | APNHAVVTRKDKEACVHK      | 582-599             |
| TRF23   | 2015.9             | SDNCEDTPEAGYFAVAVVK     | 415-433             |
| TRF26   | 1435.7             | SASDLTWDNLK GK          | 435-447             |
| TRF26   | 2518.3             | KSCHTAVGRTAGWNIPMGLLYNK | 448-470             |

Table S4. Gal80 Synbody Oligonucleotide Sequences.

| Name                  | Sequence (5'-3')                                  | Notes                                       |
|-----------------------|---------------------------------------------------|---------------------------------------------|
| Template              | 5CCGAAACAACCGCGAGAGGCACGCGCGTAGC                  | 5= amino-modifier C6 dC                     |
| Fluorescein -Template | 5CCGAAACAACCGCGAGAGGCACGCGCGTAGC3                 | 5= amino-modifier C6 dC<br>3= 6-Fluorescein |
| Variable Construct 13 | GCTACGCGCGTGCCTCTCG5GGTTGTTTCGGG                  | 5= amino-modifier C6 dC                     |
| Variable Construct 15 | GCTACGCGCGTGCCTCT5GCGGTTGTTTCGGG                  | 5= amino-modifier C6 dC                     |
| Variable Construct 17 | GCTACGCGCGTGCCT5TCGCGGTTGTTTCGGG                  | 5= amino-modifier C6 dC                     |
| Variable Construct 24 | GCTACGCG5GTGCCTCTCGCGGTTGTTTCGGG                  | 5= amino-modifier C6 dC                     |
| Variable Construct 26 | GCTACG5GCGTGCCTCTCGCGGTTGTTTCGGG                  | 5= amino-modifier C6 dC                     |
| Variable Construct 28 | GCTA5GCGCGTGCCTCTCGCGGTTGTTTCGGG                  | 5= amino-modifier C6 dC                     |
| Crosslinking Template | 5CCGAAACAACCGCGAGAGGCACGCGCGTAGCC<br>GTCACCGGCTAT | 5= amino-modifier C6 dC                     |
| Crosslinker-thiol     | 4TAGCCGGTGTGAAGTTTCTGCTAGTAATG6                   | 4= psoralen<br>6= thiol modifier C3         |
| Crosslinker-biotin    | 4TAGCCGGTGTGAAGTTTCTGCTAGTAATG6                   | 4= psoralen<br>6= biotin                    |

Table S5. Transferrin Synbody Oligonucleotide Sequences.

| Name                  | Sequence (5'-3')                  | Notes                                       |
|-----------------------|-----------------------------------|---------------------------------------------|
| Template              | 5CCGAAACAACCGCGAGAGGCACGCGCGTAGC  | 5= amino-modifier C6 dC                     |
| Fluorescein -Template | 5CCGAAACAACCGCGAGAGGCACGCGCGTAGC3 | 5= amino-modifier C6 dC<br>3= 6-Fluorescein |
| Variable Construct 3  | GCTACGCGCGTGCCTCTCGCGGTTGTTTC5GG  | 5= amino-modifier C6 dG                     |
| Variable Construct 6  | GCTACGCGCGTGCCTCTCGCGGTTGT5TCGGG  | 5= amino-modifier C6 dT                     |
| Variable Construct 9  | GCTACGCGCGTGCCTCTCGCGGTTGTTTCGGG  | 5= amino-modifier C6 dT                     |
| Variable Construct 12 | GCTACGCGCGTGCCTCTCGC5GTTGTTTCGGG  | 5= amino-modifier C6 dG                     |
| Variable Construct 15 | GCTACGCGCGTGCCTCT5GCGGTTGTTTCGGG  | 5= amino-modifier C6 dC                     |
| Variable Construct 18 | GCTACGCGCGTGCC5CTCGCGGTTGTTTCGGG  | 5= amino-modifier C6 dT                     |
| Variable Construct 21 | GCTACGCGCGT5CCTCTCGCGGTTGTTTCGGG  | 5= amino-modifier C6 dG                     |
| Variable Construct 24 | GCTACGCG5GTGCCTCTCGCGGTTGTTTCGGG  | 5= amino-modifier C6 dC                     |
| Variable Construct 27 | GCTAC5CGCGTGCCTCTCGCGGTTGTTTCGGG  | 5= amino-modifier C6 dG                     |

Complete reference from main text;

(6) Taussig, M. J.; Stoevesandt, O.; Borrebaeck, C.; Bradbury, A.; Cahill, D.; Cambillau, C.; de Daruvar, A.; Dubel, S.; Eichler, J.; Frank, R.; Gibson, T.; Gloriam, D.; Gold, L.; Herberg, F.; Hermjakob, H.; Hoheisel, J.; Joos, T.; Kallioniemi, O.; Koegl, M.; Konthur, Z.; Korn, B.; Kremmer, E.; Krobitch, S.; Landegren, U.; van der Maarel, S.; McCafferty, J.; Muyltermans, S.; Nygren, P.; Palcy, S.; Pluckthun, A.; Polic, B.; Przybylski, M.; Saviranta, P.; Sawyer, A.; Sherman, D.; Skerra, A.; Templin, M.; Ueffing, M.; Uhlen, M. *Nat. Methods* **2007**, *4*, 13-17.
